# Supplementary material
Source: Springer Nature journal article supplement (https://www.springermedizin.de/resource/supplementary/12903_2013_405_MOESM1_ESM.pdf/9516980)

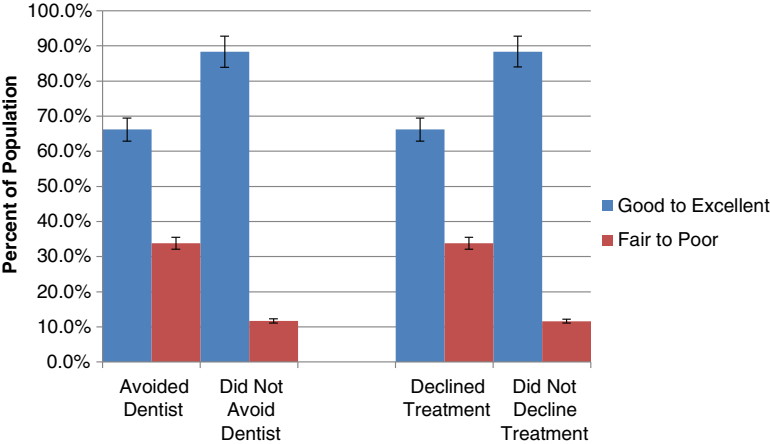

Supplement: MOESM1 [file 9516980]
